1 **Title**

2 Depth diagnosis of colorectal cancer located on a colorectal fold by  
3 quantitative evaluation of a width of colorectal - fold lateral contour  
4 using a lateral split-view computed tomographic air-contrast enema  
5 image

6  
7 Mitsutoshi Miyasaka<sup>1\*</sup>, Toshio Muraki<sup>1</sup>, Yusuke Nishimuta<sup>2</sup>, Eiji Oki<sup>3</sup>, Kousei  
8 Ishigami<sup>2</sup> and Daisuke Tsurumaru<sup>2</sup>

9  
10 <sup>1</sup> Department of Gastrointestinal Endoscopy, National Hospital Organization,  
11 Kyushu Cancer Center, Fukuoka, Japan.

12 <sup>2</sup> Department of Clinical Radiology, Graduate School of Medical Sciences,  
13 Kyushu University, Fukuoka, Japan.

14 <sup>3</sup> Department of Surgery and Science, Graduate School of Medical Sciences,  
15 Kyushu University, Fukuoka, Japan.

16  
17 \* Corresponding Author.

18 Email: [mmya7762@gmail.com](mailto:mmya7762@gmail.com) (MM)

19 • Authors' contributions;

20 Conceptualization; MM

21 Formal Analysis; EO and KI

22 Investigation; MM, TM and YN

23 Project Administration; MM

24 Supervision; DT

25 Writing- Original Draft Preparation;MM

26 **Abstract**

27 Purpose: To investigate the usefulness of quantitative evaluation of a width of  
28 lateral contour on a lateral split-view computed tomographic air-contrast enema (CT  
29 enema) image for diagnosing the invasion depth of colorectal cancer (CRC) located  
30 on a colorectal fold.

31 Methods: The cases of 22 patients with 22 fold-located CRCs (12 early CRCs and 10

32 advanced CRCs) who underwent a pretherapeutic computed tomographic colonography were  
33 retrospectively examined. T1-stage CRCs were classified into two categories according  
34 to the Japanese guideline: T1a-stage, carcinoma invading the superficial submucosa  
35 (< 1000  $\mu\text{m}$ ); and T1b-stage, carcinoma invading the deeper submucosa ( $\geq$  1000  $\mu\text{m}$ ). The  
36 maximum width of a lateral contour of the colorectal fold on which the CRC was located,  
37 i. e., the gap distance between the two adjacent haustrations, was calculated from  
38 the lateral split-view CT enema image by two gastrointestinal radiologists. These  
39 values were compared between the intramucosal / T1a CRCs and the T1b / more deeply  
40 invading CRCs. The inter-rater intraclass correlation coefficients were also  
41 evaluated for reliability.

42 Results: The maximum widths of a lateral contour of the colorectal fold were  
43 significantly higher in the T1b / more deeply invading CRCs than in the intramucosal  
44 / T1a CRCs ( $p < 0.0001$ ). The optimum cut-off value of the maximum width of a lateral  
45 contour of the colorectal fold for differentiating the former from the latter was  
46 6.0 mm, with a sensitivity and specificity of 100% and 100%, respectively. The  
47 inter-rater intraclass correlation coefficient for measurement of a lateral contour  
48 of the colorectal fold was 0.958.

49 Conclusions: We demonstrated for the first time that quantitative evaluation of a  
50 width of lateral contour using a lateral split-view CT enema image can improve the  
51 diagnostic accuracy of the invasion depth for CRCs located on a colorectal fold.

52

53 **Keywords:** colorectal cancer; lateral deformity; lateral split-view; computed  
54 tomographic air-contrast enema; computed tomographic colonography

55

## 56 Background

57 The invasion depth of colorectal cancer (CRC) lesions is closely related with their  
58 risk of metastasis. Surgical resection is the only curative treatment for CRCs with  
59 massive submucosal or deeper invasion without distant metastasis, whereas endoscopic  
60 resection is the established therapy for intramucosal CRCs or CRCs invading the  
61 superficial submucosa (< 1000  $\mu\text{m}$ ) because they have no risk of metastases [1-4].  
62 Therefore, accurate diagnosis of CRC invasion depth is crucial for determining the  
63 appropriate therapeutic strategy in CRC.

64 Computed tomographic colonography (CTC) is performed worldwide as a preoperative  
65 study in CRCs [5-8]. A lateral deformity on CT air-contrast enema (CT enema) or

66 double-contrast barium enema (DCBE) has been shown to be useful in diagnosing the  
67 invasion depth of CRCs [9-12]. However, diagnosis of invasion depth based on a lateral  
68 deformity may lead to overdiagnosis because the depth of lateral deformity on a CT  
69 enema or DCBE image in CRC is understood to depend on both the tumor geometry (mainly  
70 with respect to the size of the tumor base) and tumor invasion [13-19]. A CT enema  
71 image with cross-sectional multiplanar reconstruction (CS-MPR) images is useful to  
72 estimate the depth of lateral deformity based on the tumor geometry in colorectal  
73 polyps [20]. Additionally, the quantitative evaluation of lateral deformity on such  
74 images improve the accuracy of pretherapeutic diagnosis of the invasion depth of early  
75 CRCs [21].

76 However, when CRC lesions locate on a colorectal fold, it is difficult to estimate  
77 quantitatively the depth of lateral deformity based on the tumor geometry on a CT  
78 enema image because the lateral deformity on the CT enema image contains not only  
79 the lateral deformity caused by both the geometry and invasion of the tumor but also  
80 the curved indentation caused by the colorectal fold itself. In clinical practice,  
81 though the depth diagnosis of CRC on a colorectal fold using the lateral view of a  
82 CT enema or DCBE image is morphologically evaluated by whether width of a colorectal  
83 - fold lateral contour is significantly large or not, the evaluation sometimes differs  
84 between readers. Accordingly, it is expected that quantitative evaluation of width  
85 of a colorectal - fold lateral contour on CT enema images will improve the accuracy  
86 of pretherapeutic diagnosis of the invasion depth of CRCs located on a colorectal  
87 fold. To our knowledge, there have been no reports on quantitative evaluation of width  
88 of a colorectal - fold lateral contour using a CT enema image in the depth diagnosis  
89 of CRCs located on a colorectal fold. In the CT enema image, unlike in the DCBE image,  
90 it is possible to evaluate CRCs from any view. Therefore, we devised a lateral  
91 split-view as a new technique for evaluating the CT enema image and hypothesized that  
92 quantitative evaluation of a width of a colorectal - fold lateral contour on CT enema  
93 using the lateral split-view would be useful for the depth diagnosis of a CRC located  
94 on a colorectal fold. Thus, we conducted the present study to investigate the  
95 usefulness of determining the invasion depth of CRCs located on a colorectal fold  
96 by quantitative evaluation of widths of a colorectal - fold lateral contour on CT  
97 enema, using lateral split-views.

98

## 99 **Methods**

## 100 *Subjects*

101 The initial patient pool consisted of 142 consecutive patients with CRCs who  
102 underwent CTC as part of a pretherapeutic examination at our institution from January  
103 2014 to March 2017. One of the authors reviewed the CTC and endoscopic images in all  
104 subjects. Twenty-five patients with 25 CRCs located on a colorectal fold were enrolled  
105 and 3 patients with 3 CRCs of pedunculated type located on a colorectal fold were  
106 excluded from this study. The final study population included 22 patients (16 males  
107 and 6 females) with 22 CRCs located on a colorectal fold. The mean age of the patients  
108 was 65 years (range 47–84 years). Eight CRC lesions were resected endoscopically,  
109 and the other 14 CRCs were resected by surgery. This retrospective study was approved  
110 by the institutional review board of our hospital. The requirement for informed  
111 consent was waived. The mean interval between the CTC and the endoscopic or surgical  
112 resection was 13 days (range 2–27 days). Data was analyzed between January 9, 2014  
113 and March 31, 2017.

114

## 115 *Histology*

116 The macroscopic type of CRCs was classified according to the Paris endoscopic  
117 classification [22]. T staging was defined according to the Japanese Classification  
118 of Colorectal Carcinoma 9th edition, and early CRCs were classified into three  
119 categories: intramucosal carcinoma, high-grade dysplasia in the West; T1a-stage,  
120 carcinoma invading the superficial submucosa ( $< 1000$   $\mu\text{m}$ ); and T1b-stage, carcinoma  
121 invading the deeper submucosa ( $\geq 1000$   $\mu\text{m}$ ) (23).

122

## 123 *CTC Procedure*

124 CTC was performed on the same day of and within 1 hour after a colonoscopy, with  
125 bowel preparation using polyethylene glycol. Prior the scanning, colorectal  
126 insufflation with carbon dioxide using a CO<sub>2</sub> injector (PROTOCO2L; Bracco, Princeton,  
127 NJ) was performed. For all patients, the CTC was performed using either a 64-slice  
128 multidetector-row computed tomography (MDCT) scanner (Aquilion 64; Canon Medical  
129 Systems, Tokyo) or a 320-slice MDCT scanner (Aquilion One; Canon Medical Systems).  
130 The scanning parameters were as follows: 120 kV, 100–300 mA, beam collimation 1 mm,  
131 slice thickness 1 mm, reconstruction interval 1 mm, pitch of 53 or 65. Both supine  
132 and prone scans were underwent for all patients. The MDCT data sets were loaded to

133 a workstation (Synapse Vincent, Fujifilm Medical, Tokyo). We reconstructed CT enema  
134 images and virtual endoscopic images using the workstation.  
135

### 136 *Image analysis*

137 The definition and measurement methods of the width of a colorectal - fold lateral  
138 contour on CT enema images are shown in Fig 1. First, we identified CRCs using virtual  
139 endoscopic images and CT enema images. Then, we extracted CT enema images in the  
140 location of the CRCs using the best distended series. Next, each image was split at  
141 the central part of the lesion in the cross-sectional view of the CT enema image,  
142 and two images were extracted. Finally, the width of a colorectal - fold lateral  
143 contour in the lateral view of each split CT enema image was calculated, and the maximum  
144 value of a width of a colorectal - fold lateral contour was defined as the value of a width  
145 of a colorectal - fold lateral contour of the CRC located on a colorectal fold. We then  
146 compared the maximum width of a colorectal - fold lateral contour between the  
147 intramucosal / T1a- stage CRCs and the T1b- stage / more deeply invading CRCs.  
148 Additionally, we calculated the width of a normal colorectal - fold lateral contour  
149 located closest to the CRCs in a lateral view of a CT enema image. These measurements  
150 were performed independently by two gastrointestinal radiologists with 12 and 20 years  
151 of experience, respectively, who were given no clinicopathological information except  
152 for the lesion locations. The mean value of the maximum width of the colorectal -  
153 fold lateral contours of calculated by the two readers was defined as the most probable  
154 width of the colorectal - fold lateral contour.  
155

156 **Fig 1. Definition and measurement of a width of colorectal - fold lateral contour using**  
157 **lateral split-view CT enema images of a CRC located on a colorectal fold.**

158 First, CT enema images in the location of the CRCs were extracted using the best distended series  
159 (supine or prone), and then the split images at a central part of the lesion in the cross-sectional view  
160 of the CT enema image in the CRCs were extracted. Finally, the value of a width of colorectal -  
161 fold lateral contour in the lateral view of each split CT enema image was calculated, and the  
162 maximum value of a width of colorectal - fold lateral contour was defined as the value of  
163 a width of colorectal - fold lateral contour of the CRC located on a colorectal fold. In this  
164 case, the value of a width of colorectal - fold lateral contour calculated using split image 2

165 was defined as the value of a width of colorectal - fold lateral contour of the CRC located  
166 on a fold. L, lesion.  
167

## 168 *Statistical analysis*

169 The Student' s t-test was used to assess the differences in the maximum width  
170 of a colorectal - fold lateral contour between the intramucosal / T1a-stage and the  
171 T1b-stage / more deeply invading CRCs. We also used Receiver operating characteristic  
172 (ROC) curves to define the optimum cutoff values for the maximum width of a colorectal  
173 - fold lateral contour to differentiate these two groups of CRCs. Additionally, we  
174 calculated the intraclass correlation coefficient (ICC) to evaluate the inter-rater  
175 reliability of the assessments on the maximum width of a colorectal - fold lateral  
176 contour. ICC values of <0.50 were considered to indicate poor reliability, 0.50-0.75  
177 moderate reliability, 0.75-0.90 good reliability and values of >0.90 excellent  
178 reliability (24). All statistical analyses were performed using JMP software (JMP  
179 version 9.0.2; SAS Institute, Cary, NC). P-values <0.05 were considered significant.  
180

## 181 **Results**

182 The clinicopathological characteristics of the CRCs are summarized in Table 1.  
183 The average diameter of the CRCs was  $18.7 \pm 2.0$  mm (range 8-38 mm). Twelve lesions  
184 were early CRCs and 10 lesions were advanced CRCs (6 lesions were inrtamucosal CRCs,  
185 6 were T1-stage CRCs, 4 were T2-stage CRCs and 6 were T3/T4-stage CRCs). The  
186 macroscopic type of CRCs were 3 lesions of type 0-Is, 6 lesions of type 0-Is + IIc,  
187 1 lesion of type 0-IIa, 4 lesions of type 0-IIa + IIc, 3 lesions of type 1, and 5  
188 lesions of type 2. There was no significant difference in the age, sex, tumor size,  
189 tumor location or tumor differentiation between the intramucosal / T1a-stage CRC group  
190 and the T1b- stage / more deeply invading CRCs group.

| Clinicopathological factors    | Intramucosal / T1a-stage CRCs (n=8) | T1b-stage / more deeply invasive CRCs (n=14) | P value |
|--------------------------------|-------------------------------------|----------------------------------------------|---------|
| Age (years)(range)             | 73.1 (65-81)                        | 66.3 (44-81)                                 | 0.1054  |
| Sex                            |                                     |                                              | 0.8647  |
| Men                            | 6                                   | 10                                           |         |
| Women                          | 2                                   | 4                                            |         |
| Tumor location                 |                                     |                                              | 0.4266  |
| Right – sided colon            | 6                                   | 8                                            |         |
| Left – sided colon and rectum  | 2                                   | 6                                            |         |
| Tumor diameter (mm, mean ± SD) | 19.4 (8-38)                         | 18.8 (11-33)                                 | 0.6982  |
| Tumor differentiation          |                                     |                                              | 0.1744  |
| Differentiated type            | 8                                   | 11                                           |         |
| Undifferentiated type          | 0                                   | 3                                            |         |

191

192 **Table 1.** Characteristics of the 22 patients with 22 CRCs

193

194 Difference in the maximum width of a colorectal – fold lateral contour between the  
195 intramucosal / T1a-stage CRCs and T1b-stage / more deeply invading CRCs

196 There was a significant difference in the maximum width of a colorectal – fold  
197 lateral contour between the intramucosal / T1a-stage and T1b-stage / more deeply  
198 invading CRCs ( $3.3 \pm 1.4$  mm and  $12.1 \pm 4.6$  mm, respectively;  $p < 0.05$ ) (Fig 2). Fig  
199 3 and 4 show representative intramucosal CRC and T1b-stage CRC cases, respectively.  
200 The ROC analysis showed that the optimum cutoff value of the maximum width of a  
201 colorectal – fold lateral contour for differentiating intramucosal / T1a-stage CRCs  
202 from T1b-stage / more deeply invading CRCs was 6 mm, with an AUC of 1. If CRCs with  
203 the maximum width of a colorectal – fold lateral contour of  $>6$  mm were interpreted  
204 as T1b-stage / more deeply invading CRCs, the sensitivity and specificity for  
205 differentiating intramucosal / T1a-stage CRCs from T1b-stage / more deeply invading  
206 CRCs were 100% and 100%, respectively. The ICC value for the measurement of a  
207 colorectal – fold lateral contour was 0.958, which met the definition for excellent  
208 reliability. The mean width of a normal colorectal – fold lateral contour was  $2.3$   
209  $\pm 0.6$  mm.

210

211 **Fig 2. Comparison of the maximum values of a width of colorectal – fold lateral contour  
212 between the intramucosal / T1a-stage CRCs and T1b-stage / more deeply invading CRCs**

213 **groups.** There was a significant difference in the maximum values of a width of colorectal –  
214 fold lateral contour between the intramucosal / T1a-stage CRCs and T1b-stage / more deeply  
215 invading CRCs ( $3.3 \pm 1.4$  mm and  $12.1 \pm 4.6$  mm, respectively;  $p < 0.0001$ ).

216 **Fig 3. A 60s-year-old man with intramucosal ascending colon cancer, type 0-IIa.**

217 a. Optical endoscopic image shows an elevated lesion located on a colonic fold.

218 b. The values of a width (double arrow) of colonic - fold lateral contour on the lateral  
219 split-view CT enema images 1 and 2 in the CRC located on a fold (arrow) were 2.5 mm and 2.4 mm,  
220 respectively. Accordingly, the maximum value of a width of colonic - fold lateral contour was  
221 diagnosed as 2.5 mm.

222 **Fig 4. A 50s-year-old woman with T1b-stage ascending colon cancer, type 0-Is.**

223 a. Optical endoscopic image shows an elevated lesion located on a colonic fold.

224 b. The values of a width (double arrow) of colonic - fold lateral contour on the lateral  
225 split-view CT enema images 1 and 2 in the CRC located on a colonic fold (arrow) were 2.0 mm and  
226 11.0 mm, respectively. Accordingly, the maximum value of a width of colonic - fold lateral  
227 contour was diagnosed as 11.0 mm.

228

## 229 Discussion

230 In this study, we reported for the first time on the usefulness of quantitative  
231 evaluation of widths of a colorectal - fold lateral contour on CT enema images for  
232 the diagnosis of the invasion depth of CRCs located on a colorectal fold. A lateral  
233 deformity on a CT enema or DCBE image is one of most important indicators for the  
234 diagnosis of invasive CRC, in addition to deep depression, protrusion in depression  
235 and fold convergency [9, 12, 14, 25]. In morphologic evaluation of lateral deformity  
236 on CT enema or DCBE images in CRCs located on a colorectal fold, CRCs with “a normal  
237 width of a colorectal - fold lateral contour” are diagnosed as intramucosal /  
238 T1a-stage CRCs and those with “a large width of a colorectal - fold lateral contour”  
239 are diagnosed as T1b-stage / more- deeply invading CRCs. However, in our experience,  
240 readers morphologically evaluating widths of a colorectal - fold lateral contour on  
241 CT enema or DCBE images sometimes have differing opinions as to whether or not a width  
242 of a colorectal - fold lateral contour is significantly large. One of the reasons  
243 for the disagreement is that lateral views of CT enema or DCB images in CRCs located  
244 on a colorectal fold are composed of complex lines- i. e., the indentation of the  
245 colorectal fold, tumor surface and tumor base. CT enema imaging is better than DCBE  
246 imaging for obtaining a precise and secure lateral view [14, 25]. Furthermore, in  
247 the present study, it was possible to simplify these complex lines using lateral



248 split-view CT enema images and to calculate objectively the width of a colorectal  
249 - fold lateral contour.

250 On the other hand, previous studies have reported that lateral deformities based  
251 on tumor geometry were detectable in colorectal polyps on DCBE and CT enema images  
252 [10, 11, 18]. In CRCs, the depth of the lateral deformity based on tumor geometry  
253 depends on the size of the tumor base on a CS-MPR image. Namely, the larger the size  
254 of the tumor base is, the larger the value of the depth of lateral deformity based  
255 on the tumor geometry will be. It is also necessary to take account of the lateral  
256 deformity based on tumor geometry in the depth diagnosis due to lateral deformities  
257 in CRCs located on a colorectal fold. However, it is difficult to estimate  
258 quantitatively the depth of lateral deformities based on the tumor geometry on CT  
259 enema images in CRCs located on a colorectal fold. Nevertheless, in the present study,  
260 the diagnostic accuracy of invasion depth for CRCs located on a colorectal fold using  
261 the width of a colorectal - fold lateral contour on a CT enema image was very high,  
262 even though we could not estimate quantitatively the depth of lateral deformity based  
263 on tumor geometry. In the depth diagnosis of CRCs located on a colorectal fold using  
264 quantitative evaluation of lateral deformity on a CT enema image, it may not be very  
265 important to estimate quantitatively the depth of lateral deformity based on tumor  
266 geometry. Endoscopic ultrasound is also useful for determination of the invasion depth  
267 for CRCs, with a diagnostic accuracy of approximately 90%, but CRCs located on a  
268 colorectal fold are often difficult to image on endoscopic ultrasound [26]. The  
269 diagnosis of invasion depth for CRCs using the lateral split-view of a CT enema image,  
270 in particular, could play an important diagnostic role for CRCs located on a colorectal  
271 fold. The results of the present study show that the measurement of the width of a  
272 colorectal - fold lateral contour using a lateral split-view CT enema image can be  
273 useful to differentiate intramucosal / T1a-stage CRCs from T1b-stage / more deeply  
274 invading CRCs with high diagnostic accuracy.

275 This study had some limitations. First, there are discrepancies in the pathological  
276 diagnosis of colorectal neoplasia between the West and Japan. Namely, intramucosal  
277 cancer diagnosed by Japanese pathologists is diagnosed as high-grade dysplasia by  
278 the West pathologists. However, this discrepancy does not matter much when deciding  
279 on a treatment strategy. Second, the small number of subjects and the fact that this  
280 was a single-center retrospective study are also limitations. Further multicenter  
281 prospective studies are needed to confirm our initial findings and determine the  
282 diagnostic accuracy for the width of a colorectal - fold lateral contour.

283

## 284 Conclusions

285 In the depth diagnosis of CRC located on a colorectal fold, the use of a lateral  
286 split-view CT enema image can provide higher diagnostic accuracy for quantitative  
287 evaluation of a width of a colorectal - fold lateral contour. This may be a new  
288 diagnostic approach for determination of the invasion depth of CRCs located on a  
289 colorectal fold.  
290

## 291 List of abbreviations

292 colorectal cancer (CRC)  
293 computed tomographic colonography (CTC)  
294 computed tomographic air-contrast enema (CT enema)  
295 double-contrast barium enema (DCBE)  
296 cross-sectional multiplanar reconstruction (CS-MPR)  
297 multidetector-row computed tomography (MDCT)  
298 Receiver operating characteristic (ROC)  
299 intraclass correlation coefficient (ICC)  
300  
301

## 302 References

- 303 1. Kawamura YJ, Sakuragi M, Togashi K, Okada M, Nagai H, Konishi F. Distribution  
304 of lymph node metastasis in T1 sigmoid colon carcinoma: should we ligate the inferior  
305 mesenteric artery? *Scandinavian journal of gastroenterology*. 2005 Jul;40(7):858-61.
- 306 2. Wang HS, Liang WY, Lin TC, Chen WS, Jiang JK, Yang SH, et al. Curative resection  
307 of T1 colorectal carcinoma: risk of lymph node metastasis and long-term prognosis.  
308 *Diseases of the colon and rectum*. 2005 Jun;48(6):1182-92.
- 309 3. Kitajima K, Fujimori T, Fujii S, Takeda J, Ohkura Y, Kawamata H, et al.  
310 Correlations between lymph node metastasis and depth of submucosal invasion in  
311 submucosal invasive colorectal carcinoma: a Japanese collaborative study. *Journal*  
312 *of gastroenterology*. 2004 Jun;39(6):534-43.
- 313 4. Japanese Society for Cancer of the Colon and Rectum. guideline 2019 for the  
314 treatment of colorectal cancer  
315
- 316 5. Campillo-Soto A, Pellicer-Franco E, Parlorio-Andres E, Soria-Aledo V,

- 317 Morales-Cuenca G, Aguayo-Albasini JL. [CT colonography vs. barium enema for the  
318 preoperative study of colorectal cancer in patients with incomplete colonoscopy].  
319 *Medicina clinica*. 2007 Nov 24;129(19):725-8.
- 320 6. Neri E, Giusti P, Battolla L, Vagli P, Boraschi P, Lencioni R, et al.  
321 Colorectal cancer: role of CT colonography in preoperative evaluation after  
322 incomplete colonoscopy. *Radiology*. 2002 Jun;223(3):615-9.
- 323 7. Neri E, Turini F, Cerri F, Faggioni L, Vagli P, Naldini G, et al. Comparison  
324 of CT colonography vs. conventional colonoscopy in mapping the segmental location  
325 of colon cancer before surgery. *Abdominal imaging*. 2010 Oct;35(5):589-95.
- 326 8. Stabile Ianora AA, Moschetta M, Pedote P, Scardapane A, Angelelli G.  
327 Preoperative local staging of colosigmoideal cancer: air versus water  
328 multidetector-row CT colonography. *La Radiologia medica*. 2012 Mar;117(2):254-67.
- 329 9. Utano K, Endo K, Togashi K, Sasaki J, Kawamura HJ, Horie H, et al. Preoperative  
330 T staging of colorectal cancer by CT colonography. *Diseases of the colon and rectum*.  
331 2008 Jun;51(6):875-81.
- 332 10. Filippone A, Ambrosini R, Fuschi M, Marinelli T, Genovesi D, Bonomo L.  
333 Preoperative T and N staging of colorectal cancer: accuracy of contrast-enhanced  
334 multi-detector row CT colonography--initial experience. *Radiology*. 2004  
335 Apr;231(1):83-90.
- 336 11. Kayashima Y, Kimura F, Inoue K, Honda Y, Nakanishi T, Ito K. Computed  
337 tomographic air-contrast enema imaging for presurgical examination of colon tumors:  
338 assessment with colon phantoms and in patients. *Radiation medicine*. 2008  
339 Jan;26(1):6-14.
- 340 12. Nagata K, Endo S, Kudo SE, Kitanosono T, Kushihashi T. CT air-contrast enema  
341 as a preoperative examination for colorectal cancer. *Digestive surgery*.  
342 2004;21(5-6):352-8.
- 343 13. Ushio K, Goto H, Matsumura Y, Takayasu K, Moriyama N, Matue H. Significance  
344 of the profile view in the X-ray diagnosis of cancer of the digestive tract. *Stomach  
345 and Intestine*. 1986;21(1):27-41.
- 346 14. Ament AE, Alfidi RJ. Sessile polyps: analysis of radiographic projections  
347 with the aid of a double-contrast phantom. *AJR American journal of roentgenology*.  
348 1982 Jul;139(1):111-4.
- 349 15. Ament AE, Alfidi RJ, Rao PS. Basal indentation of sessile polypoid lesions:  
350 a function of geometry rather than a sign of malignancy. *Radiology*. 1982  
351 May;143(2):341-4.
- 352 16. Maruyama M, Koizumi K, Kai S, Kazami A, Handa T. Radiographic diagnosis of

- 353 early colorectal cancer, with special reference to the superficial type of invasive  
354 carcinoma. *World journal of surgery*. 2000 Sep;24(9):1036-46.
- 355 17. Ott DJ, Gelfand DW, Wu WC, Ablin DS. Colon polyp morphology on double-contrast  
356 barium enema: its pathologic predictive value. *AJR American journal of roentgenology*.  
357 1983 Nov;141(5):965-70.
- 358 18. Watari J, Saitoh Y, Obara T, Fujiki T, Taniguchi M, Nomura M, et al. Early  
359 nonpolypoid colorectal cancer: radiographic diagnosis of depth of invasion. *Radiology*.  
360 1997 Oct;205(1):67-74.
- 361 19. Sato T, Sakai Y, Kadowaki K, Narumi Y, Kuriyama K, Fujita M, et al.  
362 [Radio-Geometric consideration of basal indentation using phantoms and specimens].  
363 *Rinsho hoshasen Clinical radiography*. 1989 Dec;34(13):1555-61.
- 364 20. Miyasaka M, Ueda M, Muraki T, Yoshida M, Tsurumaru D, Nishimuta Y, et al.  
365 Basal Indentation Due to a Function of Geometry on CT Air-Contrast Enema for Sessile  
366 Colorectal Polyps: Quantitative Evaluation using Cross-Sectional Multiplanar  
367 Reconstruction. *J Radiol Radiat Ther*. 2014;2(3):1050.
- 368 21. Miyasaka M, Tsurumaru D, Nishimuta Y, Asayama Y, Kawanami S, Oki E, et al.  
369 Diagnosis of early colorectal cancer invasion depth by quantitative evaluation of  
370 the basal indentation in CT colonography. *Japanese journal of radiology*. 2016  
371 Dec;34(12):786-94.
- 372 22. Participants in the Paris W. The Paris endoscopic classification of  
373 superficial neoplastic lesions: esophagus, stomach, and colon: November 30 to  
374 December 1, 2002. *Gastrointestinal endoscopy*. 2003 12//;58(6, Supplement):S3-S43.
- 375 23. LH S, MK G, C W. *TNM Classification of Malignant Tumours (7th edn)*.  
376 Wiley-Blackwell. 2009.
- 377 24. Koo TK, Li MY. A Guideline of Selecting and Reporting Intraclass Correlation  
378 Coefficients for Reliability Research. *Journal of chiropractic medicine*. 2016  
379 Jun;15(2):155-63.
- 380 25. Matsumoto T, Esaki M, Hizawa K, Kurahara K, Hirakawa K, Yao T, et al. Accuracy  
381 of radiographic assessment for the diagnosis of invasion depth in small invasive  
382 colorectal cancer. *The British journal of radiology*. 2003 Sep;76(909):611-6.
- 383 26. Mukae M, Kobayashi K, Sada M, Yokoyama K, Koizumi W, Saegusa M. Diagnostic  
384 performance of EUS for evaluating the invasion depth of early colorectal cancers.  
385 *Gastrointestinal endoscopy*. 2015 Mar;81(3):682-90.
